# Supplementary material for: Patients Comfort During Highflow Oxygen Therapy With Asymmetrical Prongs: The Comfoxy-1 Trial
Source: Research Square preprint supplement (doi:10.21203/rs.3.rs-8496018/v1), 2026-01-19
Supplement: Supplementary file 1 [file 204bf88e10cfd6caca259cb9.docx]

**Table S2. Electrical impedance tomography parameters.**

| Variables | Overall  fully occlusive  nasal prong  (N. 40) | | Overall  partially occlusive  nasal prong  (N. 40) | adjusted  p-value |
| --- | --- | --- | --- | --- |
| MV | 17 [12, 21] | | 14 [11, 21] | 0.35 |
| Corrected MV | 16 [11, 20] | | 13 [10, 18] | 0.21 |
| Ventilatory ratio | 0.0026 [0.0024, 0.0027] | | 0.0025 [0.0024, 0.0026] | 0.22 |
| VT ventrale | 0.15 [0.12, 0.21] | | 0.13 [0.10, 0.19] | 0.24 |
| VT dorsale | 0.16 [0.10, 0.20] | | 0.12 [0.10, 0.18] | 0.20 |
| ΔEELI non dependent | 0.00 [0.00, 0.00] | | -0.06 [-0.16, 0.06] | 0.14 |
| ΔEELI dependent | 0.00 [0.00, 0.00] | | 0.03 [-0.04, 0.23] | 0.29 |
| Ratio VT non-dep/dep | 1.08 [0.94, 1.32] | | 0.98 [0.89, 1.39] | 0.40 |
| GI index | 0.44 [0.41, 0.49] | | 0.44 [0.41, 0.52] | 0.91 |

Variables are expressed as median, with an interquartile range [IQR]. Abbreviations: HFNC = high-flow nasal cannula; MV = minute ventilation (corrected MV expressed by , VT = tidal volume; dep = dependent; non-dep = non-dependent; GI = global inhomogeneity index; n = number.

**Table S3. Gas exchange and hemodynamic parameters.**

| Variables | Overall  fully occlusive  nasal prong  (N. 40) | Overall  partially occlusive  nasal prong  (N. 40) | adjusted  p-value |
| --- | --- | --- | --- |
|  |  |  |  |
| Respiratory rate*min-1 | 17 [12, 21] | 17 [13, 22] | 0.85 |
| Heart rate*min-1 | 80 [66, 91] | 78 [68, 89] | 0.75 |
| MAP, MmHg | 83 5,66 | 85 3,77 | 0,51 |
| PaO2/set FiO2, mmHg | 233 [189, 310] | 248 [195, 309] | 0.79 |
| PaCO2, mmHg | 39 [34, 41] | 38 [33, 41] | 0.71 |

Variables are expressed as median, with an interquartile range [IQR]. MAP is reported as a mean standard deviation and group comparisons were performed using a t-test. Abbreviations: HFNC = high-flow nasal cannula; PaO2 = arterial partial pressure of oxygen; FiO2 = inspiratory fraction of oxygen, PaCO2 = arterial partial pressure of carbon dioxide; MAP = mean arterial pressure; n = number.
